# Supplementary material for: Single-nuclei transcriptomics reveals TBX5-dependent targets in a patient with Holt-Oram syndrome
Source: JCI journal article supplement (doi:10.1172/jci180670), 2024-11-14
Supplement: sd2 [file 2]

WCL- anti-GAPDH

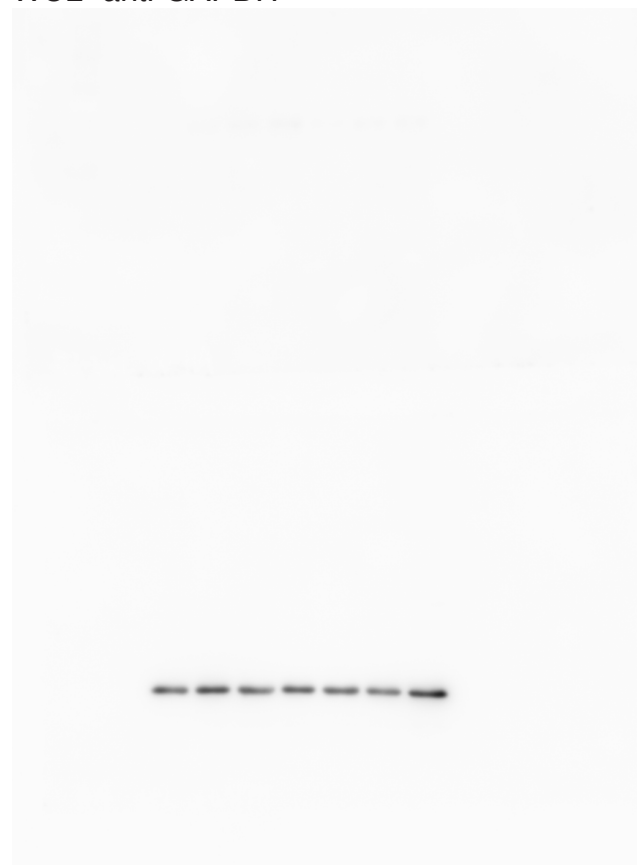

WCL- anti-HA

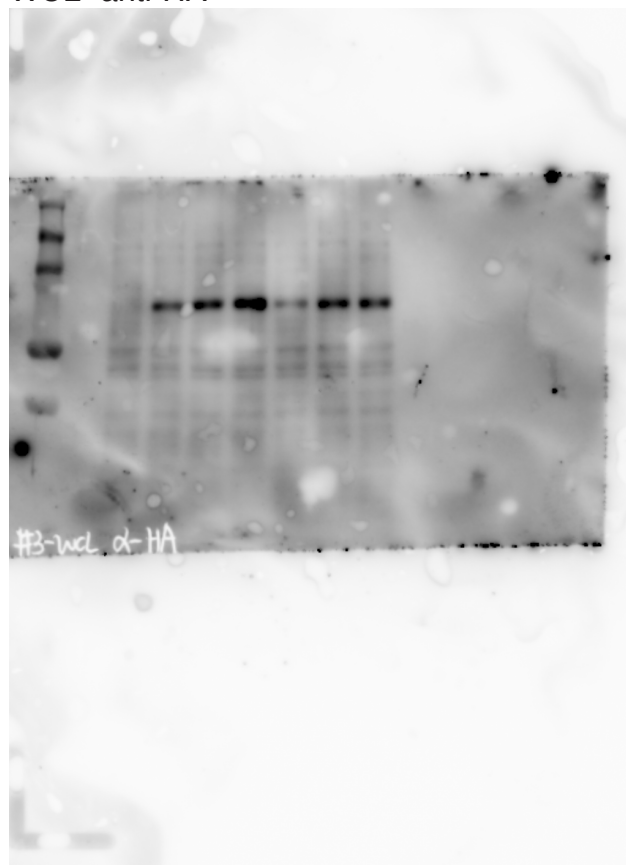

IP- anti-HA

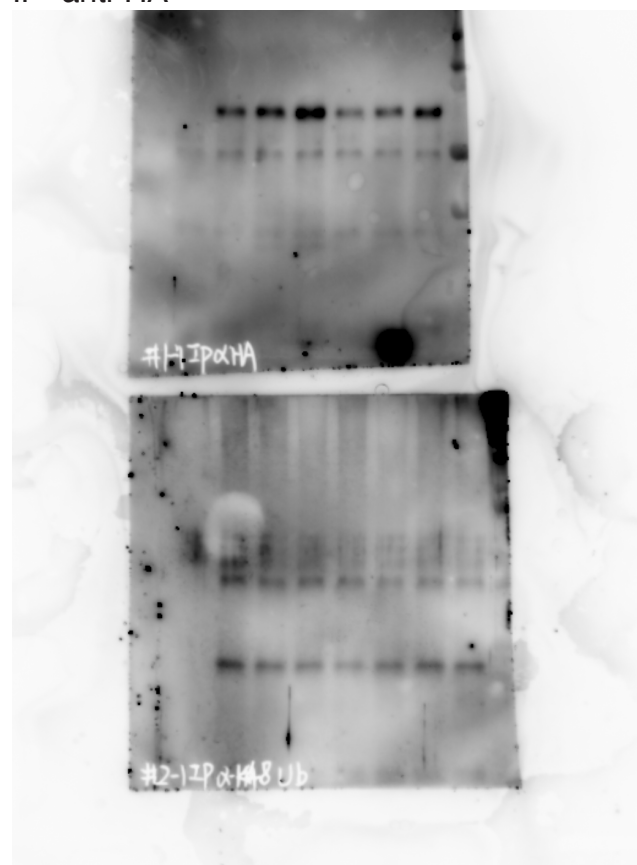

Bottom blot is not presented in this manuscript
